# Supplementary material
Source: PubMed Central journal article supplement (PMC3318659)
Supplement: supp_86.8.4566_TableS1-S2.pdf [file supp_86.8.4566_TableS1-S2.pdf]

Supplemental table 1a

|       | 6 hours      |                      |             | 24 hours     |                      |             |
|-------|--------------|----------------------|-------------|--------------|----------------------|-------------|
|       | rQnestin34.5 | VPA+<br>rQnestin34.5 | p-<br>value | rQnestin34.5 | VPA+<br>rQnestin34.5 | p-<br>value |
| CD69  | 34 (7.8)     | 7 (4.7)              | 0.007       | 42 (3.6)     | 30 (5.8)             | 0.046       |
| CD62L | 63 (4.5)     | 41 (5.5)             | 0.006       | 71.7 (2.7)   | 62 (6.4)             | 0.032       |
| NKp46 | 84 (3.0)     | 64 (4.0)             | 0.002       | 85 (4.9)     | 78 (.8)              | 0.027       |
| Ly49d | 40 (12.5)    | 18 (7.5)             | 0.043       | 51 (10.6)    | 23 (9.1)             | 0.025       |
| Ly49c | 49 (5)       | 23 (8.1)             | 0.010       | 73 (6.4)     | 47 (2.6)             | 0.002       |

**Supplemental table 1a:** VPA co-administration with oHSV reduces the activation phenotype of recruited NK cells and macrophages. Human U87dEGFR cells ( $10^5$ ) were implanted intracranially into athymic mice brains and allowed to grow for 9 days. rQnestin34.5 ( $10^4$  pfu/3ml vehicle) was then stereotactically inoculated, using the same coordinates. For VPA treated mice, two VPA treatments were performed at 12 hour intervals the day before oHSV inoculation. Six or twenty-four later mice were sacrificed and the surface expression of activation antigens were assessed on NK cells (CD69, CD62L, NKp46, Ly49d) and macrophages (Ly49c) from tumor bearing hemispheres using FACS (n=4-3 mice/group). The values in parentheses indicate the standard deviation.

Supplemental table 1b

|       | U87dEGFR+<br>Veh. | U87dEGFR+<br>VPA+Veh. | p-<br>value |
|-------|-------------------|-----------------------|-------------|
| CD69  | 25                | 22                    | 0.5         |
| CD62L | 48                | 51                    | 0.46        |
| NKp46 | 74                | 75                    | 0.71        |
| Ly49d | 28                | 24                    | 0.58        |
| Ly6c  | 27                | 20                    | 0.45        |

**Supplemental table 1b:** VPA administration in vehicle treated mice does not alter the activation phenotype of recruited NK cells and macrophages. Human U87dEGFR cells ( $10^5$ ) were implanted intracranially into athymic mice brains and allowed to grow for 9 days. For VPA treated mice, two VPA treatments were performed at 12 hour intervals the day before HBSS inoculation. Twenty-four later mice were sacrificed and the surface expression of activation antigens were assessed on NK cells (CD69, CD62L, NKp46, Ly49d) and macrophages (Ly49c) from tumor bearing hemispheres using FACS (n=3 mice/group).

Supplemental table 2a

| Symbol | Description                                          | Fold Up- or Down-Regulation   | T-TEST  |
|--------|------------------------------------------------------|-------------------------------|---------|
|        |                                                      | VPA+rQnestin34.5/rQnestin34.5 | p value |
| Abcf1  | ATP-binding cassette, sub-family F (GCN20), member 1 | 1.17                          | 0.13    |
| Bcl6   | B-cell leukemia/lymphoma 6                           | -1.12                         | 0.13    |
| Cxcr5  | Chemokine (C-X-C motif) receptor 5                   | 1.30                          | 0.07    |

|       |                                    |       |      |
|-------|------------------------------------|-------|------|
| C3    | Complement component 3             | -1.09 | 0.41 |
| Casp1 | Caspase 1                          | 1.03  | 0.50 |
| Ccl1  | Chemokine (C-C motif)<br>ligand 1  | -1.05 | 0.69 |
| Ccl11 | Chemokine (C-C motif)<br>ligand 11 | -1.27 | 0.39 |
| Ccl12 | Chemokine (C-C motif)<br>ligand 12 | -1.40 | 0.11 |
| Ccl17 | Chemokine (C-C motif)<br>ligand 17 | -1.16 | 0.41 |
| Ccl19 | Chemokine (C-C motif)<br>ligand 19 | -1.25 | 0.37 |
| Ccl2  | Chemokine (C-C motif)<br>ligand 2  | 1.34  | 0.15 |
| Ccl20 | Chemokine (C-C motif)<br>ligand 20 | 1.19  | 1.00 |
| Ccl22 | Chemokine (C-C motif)<br>ligand 22 | 1.07  | 0.96 |
| Ccl24 | Chemokine (C-C motif)<br>ligand 24 | -1.37 | 0.29 |
| Ccl25 | Chemokine (C-C motif)<br>ligand 25 | 1.27  | 0.03 |
| Ccl3  | Chemokine (C-C motif)<br>ligand 3  | 1.18  | 0.51 |
| Ccl4  | Chemokine (C-C motif)<br>ligand 4  | 1.13  | 0.74 |
| Ccl5  | Chemokine (C-C motif)<br>ligand 5  | -1.02 | 0.64 |
| Ccl6  | Chemokine (C-C motif)<br>ligand 6  | -1.05 | 0.47 |
| Ccl7  | Chemokine (C-C motif)<br>ligand 7  | 1.00  | 0.86 |
| Ccl8  | Chemokine (C-C motif)              | -1.29 | 0.13 |

|        |                                          |       |      |
|--------|------------------------------------------|-------|------|
|        | ligand 8                                 |       |      |
| Ccl9   | Chemokine (C-C motif)<br>ligand 9        | -1.72 | 0.09 |
| Ccr1   | Chemokine (C-C motif)<br>receptor 1      | -1.14 | 0.20 |
| Ccr2   | Chemokine (C-C motif)<br>receptor 2      | -1.38 | 0.14 |
| Ccr3   | Chemokine (C-C motif)<br>receptor 3      | -1.24 | 0.13 |
| Ccr4   | Chemokine (C-C motif)<br>receptor 4      | -2.32 | 0.22 |
| Ccr5   | Chemokine (C-C motif)<br>receptor 5      | -1.19 | 0.16 |
| Ccr6   | Chemokine (C-C motif)<br>receptor 6      | -1.41 | 0.47 |
| Ccr7   | Chemokine (C-C motif)<br>receptor 7      | 1.01  | 0.93 |
| Ccr8   | Chemokine (C-C motif)<br>receptor 8      | -2.46 | 0.12 |
| Ccr9   | Chemokine (C-C motif)<br>receptor 9      | -1.08 | 0.55 |
| Crp    | C-reactive protein,<br>pentraxin-related | 1.17  | 0.47 |
| Cx3cl1 | Chemokine (C-X3-C<br>motif) ligand 1     | -1.05 | 0.28 |
| Cxcl1  | Chemokine (C-X-C motif)<br>ligand 1      | 1.37  | 0.30 |
| Cxcl10 | Chemokine (C-X-C motif)<br>ligand 10     | 1.35  | 0.22 |
| Cxcl11 | Chemokine (C-X-C motif)<br>ligand 11     | -1.10 | 0.69 |
| Cxcl12 | Chemokine (C-X-C motif)<br>ligand 12     | -1.06 | 0.48 |

|         |                                       |       |      |
|---------|---------------------------------------|-------|------|
| Cxcl13  | Chemokine (C-X-C motif)<br>ligand 13  | 1.06  | 0.57 |
| Cxcl15  | Chemokine (C-X-C motif)<br>ligand 15  | N/A   | N/A  |
| Pf4     | Platelet factor 4                     | -1.02 | 0.94 |
| Cxcl5   | Chemokine (C-X-C motif)<br>ligand 5   | -1.74 | 0.07 |
| Cxcl9   | Chemokine (C-X-C motif)<br>ligand 9   | -1.00 | 0.94 |
| Cxcr3   | Chemokine (C-X-C motif)<br>receptor 3 | -2.02 | 0.04 |
| Ccr10   | Chemokine (C-C motif)<br>receptor 10  | -1.00 | 0.97 |
| Ifng    | Interferon gamma                      | -1.84 | 0.02 |
| Il10    | Interleukin 10                        | -1.27 | 0.22 |
| Il10ra  | Interleukin 10 receptor,<br>alpha     | 1.10  | 0.43 |
| Il10rb  | Interleukin 10 receptor,<br>beta      | -1.01 | 0.96 |
| Il11    | Interleukin 11                        | -1.27 | 0.05 |
| Il13    | Interleukin 13                        | -1.09 | 0.61 |
| Il13ra1 | Interleukin 13 receptor,<br>alpha 1   | 1.07  | 0.40 |
| Il15    | Interleukin 15                        | 1.10  | 0.32 |
| Il16    | Interleukin 16                        | -1.34 | 0.35 |
| Il17b   | Interleukin 17B                       | -1.55 | 0.02 |
| Il18    | Interleukin 18                        | -1.14 | 0.19 |
| Il1a    | Interleukin 1 alpha                   | 1.39  | 0.10 |
| Il1b    | Interleukin 1 beta                    | 1.58  | 0.12 |
| Il1f6   | Interleukin 1 family,                 | -1.20 | 0.59 |

|       |                                                |       |      |
|-------|------------------------------------------------|-------|------|
|       | member 6                                       |       |      |
| Il1f8 | Interleukin 1 family, member 8                 | 1.01  | 0.97 |
| Il1r1 | Interleukin 1 receptor, type I                 | -1.10 | 0.16 |
| Il1r2 | Interleukin 1 receptor, type II                | 1.41  | 0.15 |
| Il20  | Interleukin 20                                 | 1.11  | 0.67 |
| Il2rb | Interleukin 2 receptor, beta chain             | 1.02  | 0.86 |
| Il2rg | Interleukin 2 receptor, gamma chain            | 1.08  | 0.15 |
| Il3   | Interleukin 3                                  | 1.35  | 0.49 |
| Il4   | Interleukin 4                                  | -1.09 | 0.61 |
| Il5ra | Interleukin 5 receptor, alpha                  | 1.00  | 0.97 |
| Il6ra | Interleukin 6 receptor, alpha                  | -1.15 | 0.01 |
| Il6st | Interleukin 6 signal transducer                | -1.12 | 0.74 |
| Il8rb | Interleukin 8 receptor, beta                   | 1.33  | 0.22 |
| Itgam | Integrin alpha M                               | -1.11 | 0.28 |
| Itgb2 | Integrin beta 2                                | 1.07  | 0.65 |
| Lta   | Lymphotoxin A                                  | -1.55 | 0.05 |
| Ltb   | Lymphotoxin B                                  | -1.20 | 0.30 |
| Mif   | Macrophage migration inhibitory factor         | 1.03  | 0.46 |
| Scye1 | Small inducible cytokine subfamily E, member 1 | 1.06  | 0.30 |
| Spp1  | Secreted phosphoprotein 1                      | -1.26 | 0.02 |

|          |                                                           |       |      |
|----------|-----------------------------------------------------------|-------|------|
| Tgfb1    | Transforming growth factor, beta 1                        | 1.05  | 0.59 |
| Tnf      | Tumor necrosis factor                                     | 1.29  | 0.07 |
| Tnfrsf1a | Tumor necrosis factor receptor superfamily, member 1a     | 1.06  | 0.51 |
| Tnfrsf1b | Tumor necrosis factor receptor superfamily, member 1b     | -1.20 | 0.15 |
| Cd40lg   | CD40 ligand                                               | -1.62 | N/A  |
| Tollip   | Toll interacting protein                                  | 1.05  | 0.39 |
| Xcr1     | Chemokine (C motif) receptor 1                            | -1.36 | 0.60 |
| Gusb     | Glucuronidase, beta                                       | 1.03  | 0.65 |
| Hprt1    | Hypoxanthine guanine phosphoribosyl transferase 1         | 1.04  | 0.44 |
| Hsp90ab1 | Heat shock protein 90 alpha (cytosolic), class B member 1 | 1.03  | 0.47 |
| Gapdh    | Glyceraldehyde-3-phosphate dehydrogenase                  | -1.01 | 0.58 |
| Actb     | Actin, beta                                               | -1.09 | 0.11 |

Supplemental table 2b

| Symbol | Description                                          | Fold Up- or Down-Regulation   | T-TEST  |
|--------|------------------------------------------------------|-------------------------------|---------|
|        |                                                      | VPA+rQnestin34.5/rQnestin34.5 | p value |
| Abcf1  | ATP-binding cassette, sub-family F (GCN20), member 1 | 1.02                          | 0.80    |
| Bcl6   | B-cell leukemia/lymphoma 6                           | 1.07                          | 0.34    |
| Cxcr5  | Chemokine (C-X-C motif)                              | 1.12                          | 0.50    |

|       |                                    |       |      |
|-------|------------------------------------|-------|------|
|       | receptor 5                         |       |      |
| C3    | Complement component 3             | -1.07 | 0.54 |
| Casp1 | Caspase 1                          | 1.06  | 0.93 |
| Ccl1  | Chemokine (C-C motif)<br>ligand 1  | 1.20  | 0.54 |
| Ccl11 | Chemokine (C-C motif)<br>ligand 11 | -1.13 | 0.88 |
| Ccl12 | Chemokine (C-C motif)<br>ligand 12 | 1.32  | 0.20 |
| Ccl17 | Chemokine (C-C motif)<br>ligand 17 | 1.37  | 0.06 |
| Ccl19 | Chemokine (C-C motif)<br>ligand 19 | -1.61 | 0.79 |
| Ccl2  | Chemokine (C-C motif)<br>ligand 2  | 1.27  | 0.42 |
| Ccl20 | Chemokine (C-C motif)<br>ligand 20 | 1.83  | 0.06 |
| Ccl22 | Chemokine (C-C motif)<br>ligand 22 | -1.21 | 0.52 |
| Ccl24 | Chemokine (C-C motif)<br>ligand 24 | 1.25  | 0.51 |
| Ccl25 | Chemokine (C-C motif)<br>ligand 25 | -1.00 | 0.89 |
| Ccl3  | Chemokine (C-C motif)<br>ligand 3  | 1.18  | 0.83 |
| Ccl4  | Chemokine (C-C motif)<br>ligand 4  | 1.33  | 0.34 |
| Ccl5  | Chemokine (C-C motif)<br>ligand 5  | 1.32  | 0.31 |
| Ccl6  | Chemokine (C-C motif)<br>ligand 6  | 1.10  | 0.94 |
| Ccl7  | Chemokine (C-C motif)<br>ligand 7  | 1.36  | 0.34 |



|        |                                          |       |      |
|--------|------------------------------------------|-------|------|
| Ccl8   | Chemokine (C-C motif)<br>ligand 8        | -1.30 | 0.46 |
| Ccl9   | Chemokine (C-C motif)<br>ligand 9        | -1.45 | 0.08 |
| Ccr1   | Chemokine (C-C motif)<br>receptor 1      | 1.02  | 0.73 |
| Ccr2   | Chemokine (C-C motif)<br>receptor 2      | -1.15 | 0.38 |
| Ccr3   | Chemokine (C-C motif)<br>receptor 3      | -1.09 | 0.53 |
| Ccr4   | Chemokine (C-C motif)<br>receptor 4      | 1.35  | 0.68 |
| Ccr5   | Chemokine (C-C motif)<br>receptor 5      | -1.05 | 0.67 |
| Ccr6   | Chemokine (C-C motif)<br>receptor 6      | -2.38 | 0.31 |
| Ccr7   | Chemokine (C-C motif)<br>receptor 7      | 1.49  | 0.15 |
| Ccr8   | Chemokine (C-C motif)<br>receptor 8      | -1.12 | N/A  |
| Ccr9   | Chemokine (C-C motif)<br>receptor 9      | -1.15 | 0.39 |
| Crp    | C-reactive protein,<br>pentraxin-related | 1.29  | N/A  |
| Cx3cl1 | Chemokine (C-X3-C motif)<br>ligand 1     | 1.00  | 0.93 |
| Cxcl1  | Chemokine (C-X-C motif)<br>ligand 1      | 1.05  | 0.59 |
| Cxcl10 | Chemokine (C-X-C motif)<br>ligand 10     | 1.56  | 0.14 |
| Cxcl11 | Chemokine (C-X-C motif)<br>ligand 11     | 1.70  | 0.15 |
| Cxcl12 | Chemokine (C-X-C motif)                  | 1.00  | 0.98 |

|         |                                       |       |      |
|---------|---------------------------------------|-------|------|
|         | ligand 12                             |       |      |
| Cxcl13  | Chemokine (C-X-C motif)<br>ligand 13  | -1.10 | 0.54 |
| Cxcl15  | Chemokine (C-X-C motif)<br>ligand 15  | N/A   | N/A  |
| Pf4     | Platelet factor 4                     | -1.01 | 0.74 |
| Cxcl5   | Chemokine (C-X-C motif)<br>ligand 5   | -1.19 | 0.76 |
| Cxcl9   | Chemokine (C-X-C motif)<br>ligand 9   | 1.18  | 0.78 |
| Cxcr3   | Chemokine (C-X-C motif)<br>receptor 3 | -1.28 | 0.45 |
| Ccr10   | Chemokine (C-C motif)<br>receptor 10  | -1.08 | 0.42 |
| Ifng    | Interferon gamma                      | 2.26  | 0.17 |
| Il10    | Interleukin 10                        | -1.08 | 0.74 |
| Il10ra  | Interleukin 10 receptor,<br>alpha     | 1.01  | 0.95 |
| Il10rb  | Interleukin 10 receptor, beta         | 1.09  | 0.74 |
| Il11    | Interleukin 11                        | -1.15 | 0.22 |
| Il13    | Interleukin 13                        | 1.27  | 0.58 |
| Il13ra1 | Interleukin 13 receptor,<br>alpha 1   | -1.01 | 0.84 |
| Il15    | Interleukin 15                        | 1.02  | 0.93 |
| Il16    | Interleukin 16                        | 1.02  | 0.99 |
| Il17b   | Interleukin 17B                       | -1.24 | 0.23 |
| Il18    | Interleukin 18                        | -1.12 | 0.30 |
| Il1a    | Interleukin 1 alpha                   | 1.05  | 0.86 |
| Il1b    | Interleukin 1 beta                    | -1.12 | 0.59 |
| Il1f6   | Interleukin 1 family,                 | 1.67  | 0.25 |

|       |                                                   |       |      |
|-------|---------------------------------------------------|-------|------|
|       | member 6                                          |       |      |
| Il1f8 | Interleukin 1 family,<br>member 8                 | -1.09 | 0.84 |
| Il1r1 | Interleukin 1 receptor, type I                    | 1.03  | 0.82 |
| Il1r2 | Interleukin 1 receptor, type<br>II                | 1.04  | 0.86 |
| Il20  | Interleukin 20                                    | -1.30 | N/A  |
| Il2rb | Interleukin 2 receptor, beta<br>chain             | 1.28  | 0.34 |
| Il2rg | Interleukin 2 receptor,<br>gamma chain            | -1.03 | 0.79 |
| Il3   | Interleukin 3                                     | -1.66 | 0.31 |
| Il4   | Interleukin 4                                     | -1.01 | 0.70 |
| Il5ra | Interleukin 5 receptor, alpha                     | -1.32 | 0.06 |
| Il6ra | Interleukin 6 receptor, alpha                     | -1.06 | 0.63 |
| Il6st | Interleukin 6 signal<br>transducer                | -1.03 | 0.67 |
| Il8rb | Interleukin 8 receptor, beta                      | -1.15 | 0.53 |
| Itgam | Integrin alpha M                                  | -1.03 | 0.75 |
| Itgb2 | Integrin beta 2                                   | 1.05  | 0.93 |
| Lta   | Lymphotoxin A                                     | 1.60  | 0.07 |
| Ltb   | Lymphotoxin B                                     | 1.26  | 0.44 |
| Mif   | Macrophage migration<br>inhibitory factor         | 1.17  | 0.11 |
| Scye1 | Small inducible cytokine<br>subfamily E, member 1 | -1.31 | 0.36 |
| Spp1  | Secreted phosphoprotein 1                         | -1.13 | 0.57 |
| Tgfb1 | Transforming growth factor,<br>beta 1             | 1.01  | 0.90 |
| Tnf   | Tumor necrosis factor                             | 1.35  | 0.32 |

|          |                                                           |       |      |
|----------|-----------------------------------------------------------|-------|------|
| Tnfrsf1a | Tumor necrosis factor receptor superfamily, member 1a     | 1.07  | 0.73 |
| Tnfrsf1b | Tumor necrosis factor receptor superfamily, member 1b     | 1.00  | 0.92 |
| Cd40lg   | CD40 ligand                                               | -2.41 | N/A  |
| Tollip   | Toll interacting protein                                  | 1.04  | 0.30 |
| Xcr1     | Chemokine (C motif) receptor 1                            | -1.06 | 0.80 |
| Gusb     | Glucuronidase, beta                                       | -1.02 | 0.73 |
| Hprt1    | Hypoxanthine guanine phosphoribosyl transferase 1         | 1.06  | 0.57 |
| Hsp90ab1 | Heat shock protein 90 alpha (cytosolic), class B member 1 | -1.02 | 0.70 |
| Gapdh    | Glyceraldehyde-3-phosphate dehydrogenase                  | 1.05  | 0.44 |
| Actb     | Actin, beta                                               | 1.03  | 0.80 |

**Supplemental table 2: List of inflammatory cytokines in tumor tissue after either oHSV treatment or VPA treatment followed by oHSV administration.** Human U87dEGFR cells ( $10^5$ ) were implanted intracranially into athymic mice brains and allowed to grow for 9 days. rQnestin34.5 ( $10^4$  pfu/3ml vehicle) was then stereotactically inoculated, using the same coordinates. For VPA treated mice, two VPA treatments were performed at 12 hour intervals the day before oHSV inoculation. Twenty-four (a) or seventy-two hours later (b), mice were sacrificed for mRNA isolation of the tumor bearing hemisphere. Following mRNA conversion to cDNA, the expression of 84 mouse inflammatory genes were analyzed by RT-qPCR array. Values > 1 indicate genes that

are up-regulated compared rQnestin34.5 treated mice and values  $< 1$  indicate genes that are down-regulated compared to rQnestin34.5 treated mice.

**Supplemental Figure 1: VPA administration in vehicle treated mice does not alter immune cell infiltration.** Human U87dEGFR cells ( $10^5$ ) were implanted intracranially into athymic mice brains and allowed to grow for 9 days. For VPA treated mice, two VPA treatments were performed at 12 hour intervals the day before HBSS inoculation. Twenty-four hours later, mice were sacrificed and tumor bearing hemispheres were harvested to quantify the number of recruited NK, macrophages, and lymphocytes by FACS.

**Supplemental Figure 2: Comparison of IFN- $\gamma$  production by NK cells upon stimulation with cytokines or Toll-like receptor stimuli in the presence or absence of VPA.** Data showed that in vitro NK cells respond to cytokine stimulation to produce IFN- $\gamma$  and the responsiveness is inhibited by VPA. However, the level of IFN- $\gamma$  production by NK cells upon stimulation with Toll-like receptor stimuli, LPS and Pam2CSK4, was very low or undetectable.

**Supplemental figure 3: VPA does not alter the rate of encephalitis onset in mice treated with wild-type HSV.** Glioblastoma free athymic mice were treated with either vehicle or two VPA treatments at 12 hour intervals the day before wild-type HSV inoculation. The following day, wild-type HSV ( $10^4$  pfu) was inoculated intracranially and mice were monitored for the onset of neurological symptoms.
