# Supplementary material
Source: PubMed Central journal article supplement (PMC3318659)

A

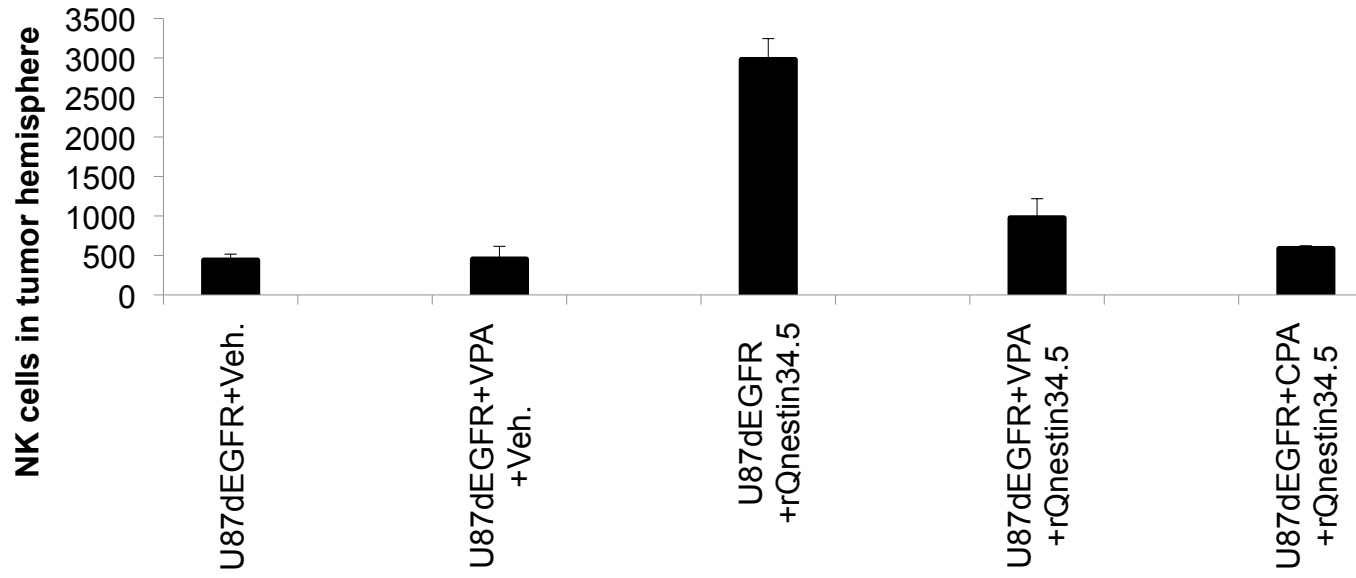

B.

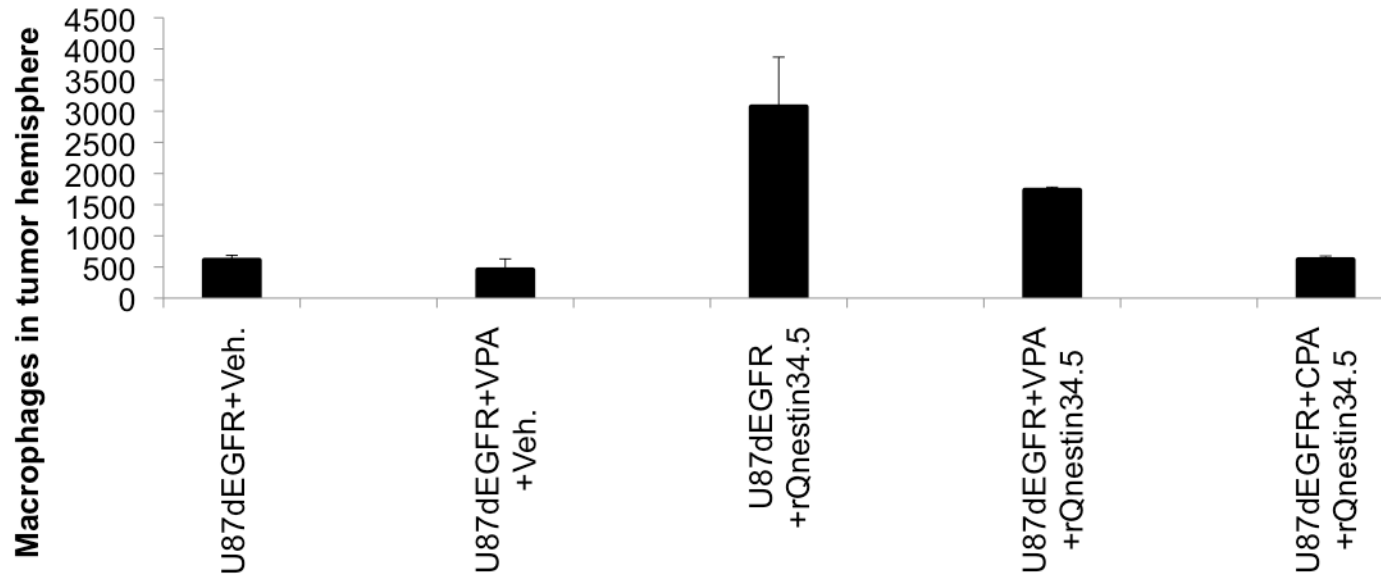

C.

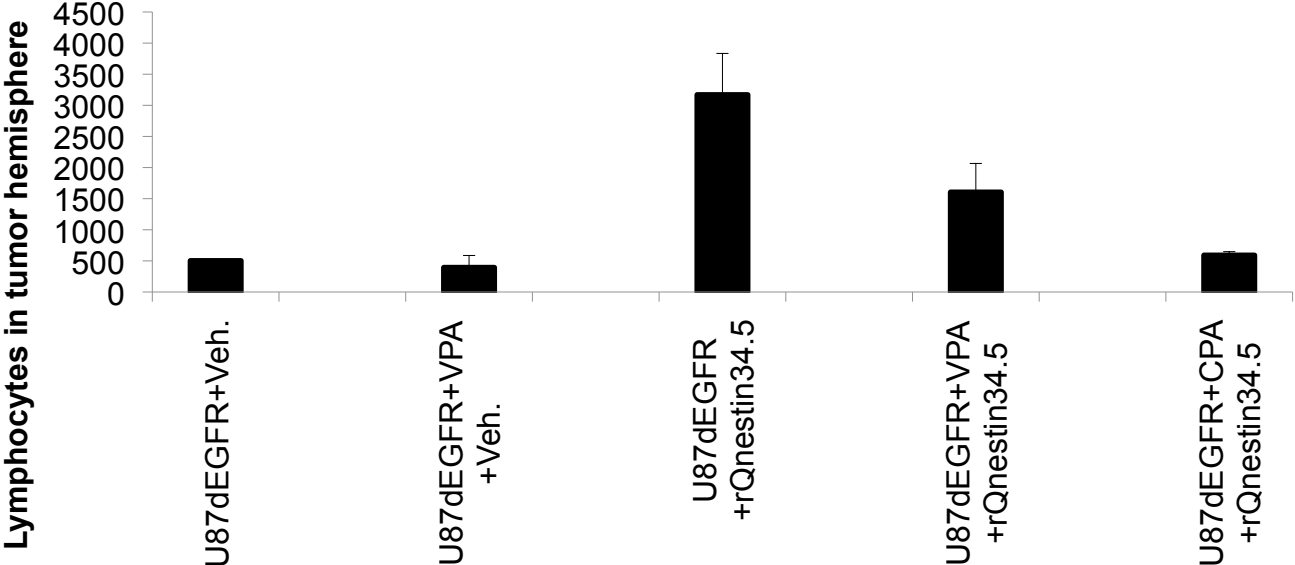

Supplemental Figure 2

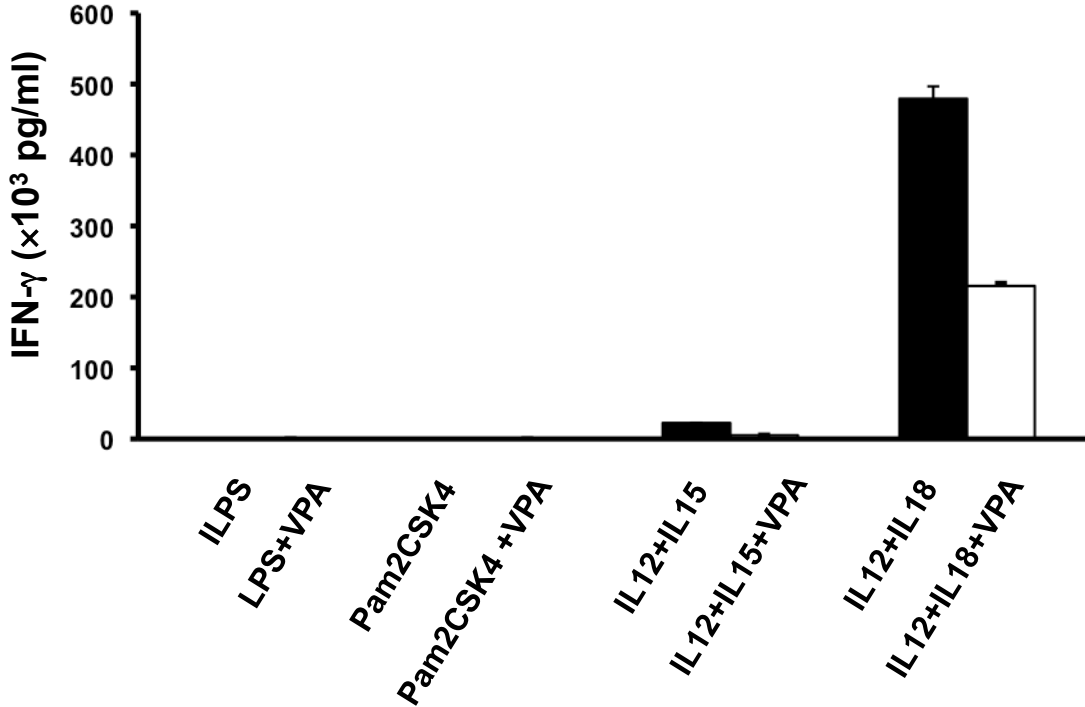

Supplemental Figure 3

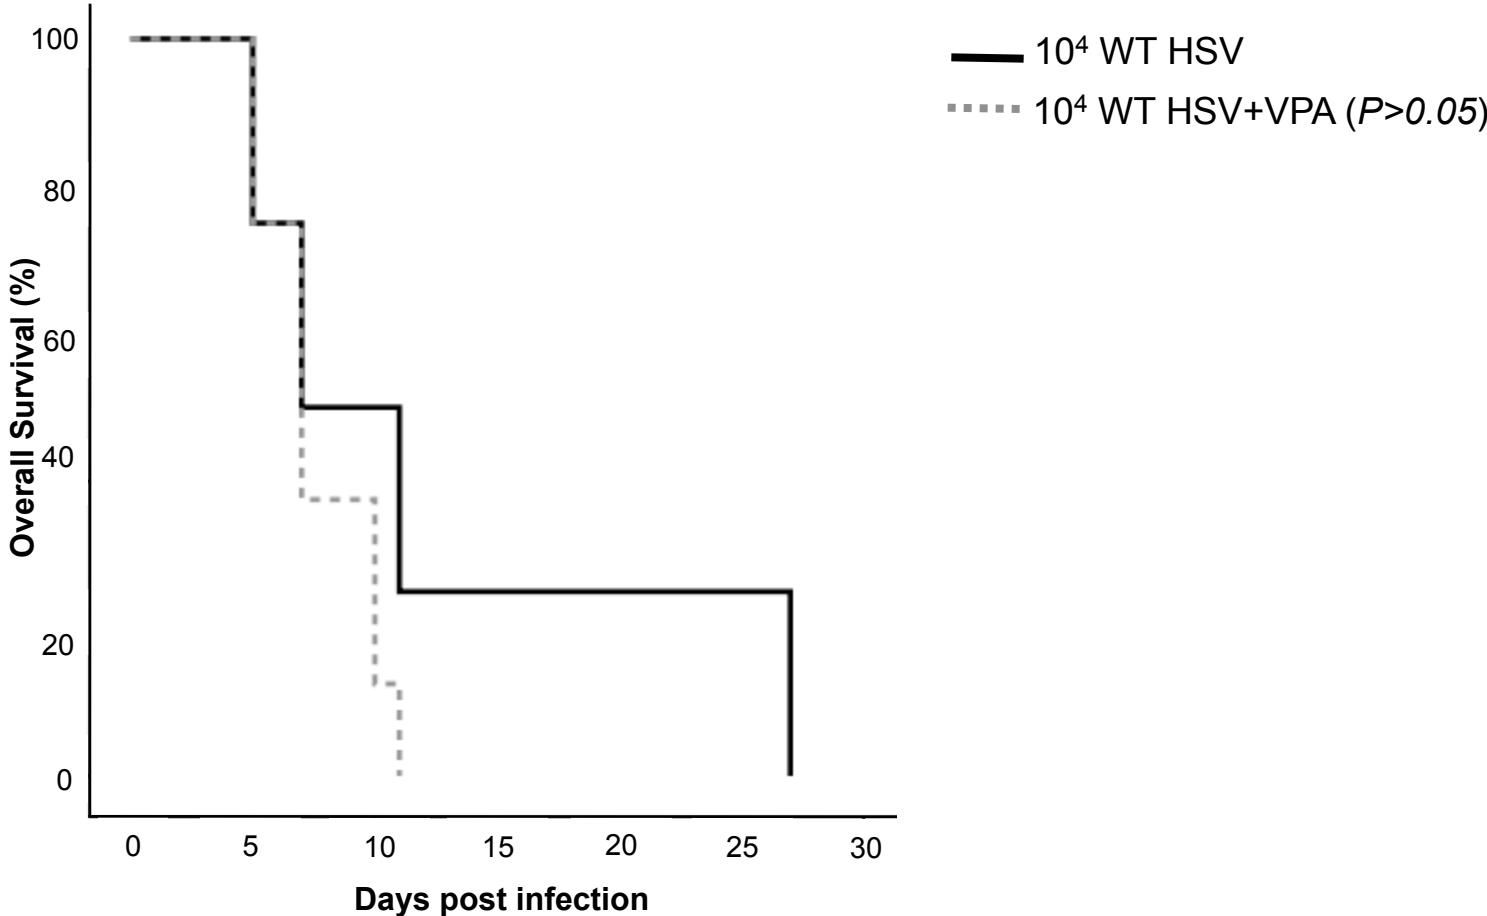

Supplement: supp_86.8.4566_FigS1-S3.pdf [file supp_86.8.4566_FigS1-S3.pdf]
